# Supplementary material
Source: HighWire-hosted journal article supplement (doi:10.1101/rna.080338.124)
Supplement: Supplemental_Tables_1-6.xlsx [file Supplemental_Tables_1-6.xlsx]

## Sheet: Supplementary Table 1
Supplementary Table 1. DNA Oligonucleotides for constructing sgRNAs
sgRNA name	Oligo names	ssDNA oligonucleotides containing the spacer sequences	Target gene	Spacer sequence
pU6sgD8P1	sgD8-P1-F	CACCgtacatgcagcgtgtcctca	DGCR8	gtacatgcagcgtgtcctca
	sgD8-P1-R	AAACtgaggacacgctgcatgtac
pU6sgD8P5	sgD8-P5-F	CACCgtctataatttctttgaatg	DGCR8	gtctataatttctttgaatg
	sgD8-P5-R	AAACcattcaaagaaattatagac
pU6sgD8N1	sgD8-N1-F	CACCagacctcggatttcccgttg	DGCR8	agacctcggatttcccgttg
	sgD8-N1-R	AAACcaacgggaaatccgaggtct
pU6sgD8N2	sgD8-N2-F	CACCctcgtgcaggatgcagacct	DGCR8	ctcgtgcaggatgcagacct
	sgD8-N2-R	AAACaggtctgcatcctgcacgag
pU6sgD8N4	sgD8-N4-F	CACCcacgctgcatgtactcgtgc	DGCR8	cacgctgcatgtactcgtgc
	sgD8-N4-R	AAACcacgctgcatgtactcgtgc
pU6sgD8N5	sgD8-N5-F	CACCcaaagaaattatagacaggg	DGCR8	caaagaaattatagacaggg
	sgD8-N5-R	AAACccctgtctataatttctttg
pU6sgDE1	sgDE1-F	CACCaggtgactccataatgcaac	DROSHA	aggtgactccataatgcaac
	sgDE1-R	AAACgttgcattatggagtcacct
pU6sgDE2	sgDE2-F	CACCcatttcccagatcatcatga	DROSHA	catttcccagatcatcatga
	sgDE2-R	AAACtcatgatgatctgggaaatg
pU6sgDE3	sgDE3-F	CACCaaggacacttaactgtgagt	DROSHA	aaggacacttaactgtgagt
	sgDE3-R	AAACactcacagttaagtgtcctt
pU6sgDE4	sgDE4-F	CACCaaaccaaatacaattcccta	DROSHA	aaaccaaatacaattcccta
	sgDE4-R	AAACtagggaattgtatttggttt
pU6sgDE5	sgDE5-F	CACCaacacccagaattttaaaaa	DROSHA	aacacccagaattttaaaaa
	sgDE5-R	AAACtttttaaaattctgggtgtt
pU6sgDE6	sgDE6-F	CACCaagaaatcaataaccattta	DROSHA	aagaaatcaataaccattta
	sgDE6-R	AAACtttttaaaattctgggtgtt
pU6sgDE7	sgDE7-F	CACCggaatttcattctctgattg	DROSHA	ggaatttcattctctgattg
	sgDE7-R	AAACcaatcagagaatgaaattcc

## Sheet: Supplementary Table 2
Supplementary Table 2. DNA Oligonucleotides for constructing plasmids and donor dsDNAs
Primer names	Sequence
F-U6-BsmBI-scaffold	atcttgtggaaaggacgaaacaccGGAGACGCGATCGCGATCGATCGTCTCAgttttagagctagaaatagc
R-HindIII	agaggtacctcgagcggccc
F-BamHI-U6	aaggaaccaattcagtcgact
R-U6	ggtgtttcgtcctttccacaagat
F-BglII-mCherry	aagtcgacaccggggcccagatctGGATCCatggtgagcaagggcgagg
R-NotI-mCherry	atatcgccggcggccgcctacttgtacagctcgtccatgc
F-MicroNotI-pri30a	acgagctgtacaagtaggcggccgcTATTGCTGTTGACAGTGAGC
R-MicroEcoRV-pri30a	ctgattatgatcctctggagatatcTGAAGTCCGAGGCAGTAG
F-MicroNotI-pri16-1	cgagctgtacaagtaggcggccgcTGATAGCAATGTCAGCAGTGC
R-MicroEcoRV-pri16-1	gattatgatcctctggagatatcTAGAGTATGGTCAACCTTACTTCA
T7EI-F-DGCR8	gtataagcctctgcattttaacatca
T7EI-R-DGCR8	agaaaccagcaaggcaga
T7EI-F-DGCR8-E518K	GGTCTGCATCCTGCACAAGTACATGCAGCGTGTCCTCAAG
T7EI-R-DGCR8-E518K	ACACGCTGCATGTACTTGTGCAGGATGCAGACCTCGGATT
M4-si22-F	ggccgcACAGTTCTTCAACTGGCAGCTTgat
M4-si22-R	atcAAGCTGCCAGTTGAAGAACTGTgc
M4-si23a-F	ggccgcGGAAATCCCTGGCAATGTGATgat
M4-si23a-R	atcATCACATTGCCAGGGATTTCCgc
M4-si200a-F	ggccgcACATCGTTACCAGACAGTGTTAgat
M4-si200a-R	atcTAACACTGTCTGGTAACGATGTgc
M4-si95-F	ggccgcTGCTCAATAAATACCCGTTGAAgat
M4-si95-R	atcTTCAACGGGTATTTATTGAGCAgc
M4-si2x200b-F	ggccgcTCATCATTACCAGGCAGTATTAATCCTAGTCATCATTACCAGGCAGTATTAgat
M4-si2X200b-R	atcTAATACTGCCTGGTAATGATGACTAGGATTAATACTGCCTGGTAATGATGAgc
M4-si2X24-F	ggccgcCTGTTCCTGCTGAACTGAGCCAATCCTAGCTGTTCCTGCTGAACTGAGCCAgat
M4-si2X24-R	atcTGGCTCAGTTCAGCAGGAACAGCTAGGATTGGCTCAGTTCAGCAGGAACAGgc
M4-si2X128-F	ggccgcAAAGAGACCGGTTCACTGTGAATCCTAGAAAGAGACCGGTTCACTGTGAgat
M4-si2X128-R	atcTCACAGTGAACCGGTCTCTTTCTAGGATTCACAGTGAACCGGTCTCTTTgc
M4-si30a-F	ggccgcCTTCCaGTCGaGGaTGTTTaCagat
M4-si30a-R	atctGtAAACAtCCtCGACtGGAAGgc

## Sheet: Supplementary Table 3
Supplementary Table 3. Primer sequences for pri-miRNA synthesis
Primer sequences used in pri-miRNA synthesis
Pri-miRNAs	Primer name	Primer sequence (5'-3')	Pri-miRNA sequences	Method
hsa-pri-mir-16-1	F-T7-hsa-pri-mir-16-1	TAATACGACTCACTATAGGGTGATAGCAATGTCAGCAGTGC	GGGTGATAGCAATGTCAGCAGTGCCTTAGCAGCACGTAAATATTGGCGTTAAGATTCTAAAATTATCTCCAGTATTAACTGTGCTGCTGAAGTAAGGTTGACCATACTCTA	PCR from human genomic DNA
	R-hsa-pri-mir-16-1	TAGAGTATGGTCAACCTTAC
hsa-pri-mir-30a	F-T7-hsa-pri-mir-30a	TAATACGACTCACTATAGGGTATTGCTGTTGACAGTGA	GGGTATTGCTGTTGACAGTGAGCGACTGTAAACATCCTCGACTGGAAGCTGTGAAGCCACAGATGGGCTTTCAGTCGGATGTTTGCAGCTGCCTACTGCCTCGGACTTCA	PCR from human genomic DNA
	R-hsa-pri-mir-30a	TGAAGTCCGAGGCAGTAGGCAGCTGC
hsa-pri-mir-576	F-T7-hsa-pri-mir-576	TAATACGACTCACTATAGGGTAACTGCACCATTTTACAATCCAAC	GGGTAACTGCACCATTTTACAATCCAACGAGGATTCTAATTTCTCCACGTCTTTGGTAATAAGGTTTGGCAAAGATGTGGAAAAATTGGAATCCTCATTCGATTGGTTATAACCATC	PCR from human genomic DNA
	R-hsa-pri-mir-576	GATGGTTATAACCAATCGAATGAGGATTCC
hsa-pri-mir-196a-2	F-T7-196a-2	TAATACGACTCACTATAGGGCTGCTCGCTCAGCTGATCTGTGG	GGGCTGCTCGCTCAGCTGATCTGTGGCTTAGGTAGTTTCATGTTGTTGGGATTGAGTTTTGAACTCGGCAACAAGAAACTGCCTGAGTTACATCAGTCGGTTTTCGTC	PCR from human genomic DNA
	R-196a-2	GACGAAAACCGACTGATGTAAC
hsa-pri-mir-30e	F-T7-pri-30e	TAATACGACTCACTATAGGGGTTCTTTCTGGGCAGTCTTTG	GGGGTTCTTTCTGGGCAGTCTTTGCTACTGTAAACATCCTTGACTGGAAGCTGTAAGGTGTTCAGAGGAGCTTTCAGTCGGATGTTTACAGCGGCAGGCTGCCACGGTCGTCC	PCR from human genomic DNA
	R-pri-30e	GGACGACCGTGGCAGCCTGCC
hsa-pri-mir-182	F-T7-182	TAATACGACTCACTATAGGGGAGCTGCTTGCCTCCCCCCGTT	GGGGAGCTGCTTGCCTCCCCCCGTTTTTGGCAATGGTAGAACTCACACTGGTGAGGTAACAGGATCCGGTGGTTCTAGACTTGCCAACTATGGGGCGAGGACTCAGCCGGCACCC	PCR from human genomic DNA
	R-182	GGGTGCCGGCTGAGTCCTCGCCCCA
hsa-pri-mir-342	F-T7-342	TAATACGACTCACTATAGGGCTACTCGGCCCGCACTCT CTCCATTAC	GGGTGAAACTGGGCTCAAGGTGAGGGGTGCTATCTGT GATTGAGGGACATGGTTAATGGAATTGTCTCACACAGA AATCGCACCCGTCACCTTGGCCTACTTATCAC	PCR from human genomic DNA
	R-342	GTGATAAGTAGGCCAAGGTGACGG
hsa-pri-mir-29b1	F-T7-29b-1	TAATACGACTCACTATAGGGGATCATAAAGCTTCTTCAGGAAGCT	GGGGATCATAAAGCTTCTTCAGGAAGCTGGTTTCATATGGTGGTTTAGATTTAAATAGTGATTGTCTAGCACCATTTGAAATCAGTGTTCTTGGGGGAGACCAGCTGCGCT	PCR from human genomic DNA
	R-29b-1	AGCGCAGCTGGTCTCCCCCAAGAAC

## Sheet: Supplementary Table 4
Supplementary Table 4. Quantitative analysis the pri-miRNA processing
Figure	Pri-miRNAs	Enzyme	Repeat	Efficiency (normalized to D3G2)
1D	pri-mir-16-1	D3G2	1	0.989736
1D	pri-mir-16-1	NLSD3-D8-WT	1	0.517945
1D	pri-mir-16-1	NLSD3-D8-E518K	1	0.3641
1D	pri-mir-16-1	D3G2	2	0.934781
1D	pri-mir-16-1	NLSD3-D8-WT	2	0.745298
1D	pri-mir-16-1	NLSD3-D8-E518K	2	0.571606
1D	pri-mir-16-1	D3G2	3	1.07548
1D	pri-mir-16-1	NLSD3-D8-WT	3	0.846863
1D	pri-mir-16-1	NLSD3-D8-E518K	3	0.656882
1D	pri-mir-30a	D3G2	1	0.774735
1D	pri-mir-30a	NLSD3-D8-WT	1	2.90753
1D	pri-mir-30a	NLSD3-D8-E518K	1	0.501299
1D	pri-mir-30a	D3G2	2	1.14464
1D	pri-mir-30a	NLSD3-D8-WT	2	6.2094
1D	pri-mir-30a	NLSD3-D8-E518K	2	1.13451
1D	pri-mir-30a	D3G2	3	1.08063
1D	pri-mir-30a	NLSD3-D8-WT	3	6.1303
1D	pri-mir-30a	NLSD3-D8-E518K	3	1.61589
5G	pri-mir-576	D3G2	1	0.933882
5G	pri-mir-576	NLSD3-D8-WT	1	3.66105
5G	pri-mir-576	NLSD3-D8-E518K	1	0.515641
5G	pri-mir-576	D3G2	2	0.937076
5G	pri-mir-576	NLSD3-D8-WT	2	3.83886
5G	pri-mir-576	NLSD3-D8-E518K	2	0.417353
5G	pri-mir-576	D3G2	3	1.12904
5G	pri-mir-576	NLSD3-D8-WT	3	4.02037
5G	pri-mir-576	NLSD3-D8-E518K	3	0.564521
5G	pri-mir-196a-2	D3G2	1	1.30228
5G	pri-mir-196a-2	NLSD3-D8-WT	1	22.6529
5G	pri-mir-196a-2	NLSD3-D8-E518K	1	2.09051
5G	pri-mir-196a-2	D3G2	2	1.03451
5G	pri-mir-196a-2	NLSD3-D8-WT	2	26.3594
5G	pri-mir-196a-2	NLSD3-D8-E518K	2	3.55873
5G	pri-mir-196a-2	D3G2	3	0.663201
5G	pri-mir-196a-2	NLSD3-D8-WT	3	18.4998
5G	pri-mir-196a-2	NLSD3-D8-E518K	3	1.15187
5G	pri-mir-30e	D3G2	1	1.25908
5G	pri-mir-30e	NLSD3-D8-WT	1	4.29285
5G	pri-mir-30e	NLSD3-D8-E518K	1	1.12717
5G	pri-mir-30e	D3G2	2	0.836175
5G	pri-mir-30e	NLSD3-D8-WT	2	3.48887
5G	pri-mir-30e	NLSD3-D8-E518K	2	0.79773
5G	pri-mir-30e	D3G2	3	0.904749
5G	pri-mir-30e	NLSD3-D8-WT	3	2.76088
5G	pri-mir-30e	NLSD3-D8-E518K	3	0.419729
5G	pri-mir-182	D3G2	1	1.06069
5G	pri-mir-182	NLSD3-D8-WT	1	0.980993
5G	pri-mir-182	NLSD3-D8-E518K	1	0.906991
5G	pri-mir-182	D3G2	2	1.0402
5G	pri-mir-182	NLSD3-D8-WT	2	0.88628
5G	pri-mir-182	NLSD3-D8-E518K	2	0.973774
5G	pri-mir-182	D3G2	3	0.899109
5G	pri-mir-182	NLSD3-D8-WT	3	0.782342
5G	pri-mir-182	NLSD3-D8-E518K	3	0.54005
5G	pri-mir-342	D3G2	1	1.29036
5G	pri-mir-342	NLSD3-D8-WT	1	2.3783
5G	pri-mir-342	NLSD3-D8-E518K	1	2.40079
5G	pri-mir-342	D3G2	2	0.870532
5G	pri-mir-342	NLSD3-D8-WT	2	1.95087
5G	pri-mir-342	NLSD3-D8-E518K	2	1.62833
5G	pri-mir-342	D3G2	3	0.839111
5G	pri-mir-342	NLSD3-D8-WT	3	1.58727
5G	pri-mir-342	NLSD3-D8-E518K	3	1.73984
5G	pri-mir-29b-1	D3G2	1	1.41379
5G	pri-mir-29b-1	NLSD3-D8-WT	1	57.9652
5G	pri-mir-29b-1	NLSD3-D8-E518K	1	37.1935
5G	pri-mir-29b-1	D3G2	2	0.650766
5G	pri-mir-29b-1	NLSD3-D8-WT	2	39.4798
5G	pri-mir-29b-1	NLSD3-D8-E518K	2	21.5837
5G	pri-mir-29b-1	D3G2	3	0.935447
5G	pri-mir-29b-1	NLSD3-D8-WT	3	46.8893
5G	pri-mir-29b-1	NLSD3-D8-E518K	3	21.6322
Figure	Pri-miRNAs	Enzyme	Repeat	Efficiency (normalized to uncleaved pri-miR)
S5C, S5D	pri-mir-196a-2	no	1	1
S5C, S5D	pri-mir-196a-2	NLSD3-D8-WT	1	0.282
S5C, S5D	pri-mir-196a-2	NLSD3-D8-E518K	1	0.027
S5C, S5D	pri-mir-196a-2	no	2	1
S5C, S5D	pri-mir-196a-2	NLSD3-D8-WT	2	0.522
S5C, S5D	pri-mir-196a-2	NLSD3-D8-E518K	2	0.458
S5C, S5D	pri-mir-196a-2	no	3	1
S5C, S5D	pri-mir-196a-2	NLSD3-D8-WT	3	0.46
S5C, S5D	pri-mir-196a-2	NLSD3-D8-E518K	3	0.433
S5C, S5D	pri-mir-30e	no	1	1
S5C, S5D	pri-mir-30e	NLSD3-D8-WT	1	0.002
S5C, S5D	pri-mir-30e	NLSD3-D8-E518K	1	0.085
S5C, S5D	pri-mir-30e	no	2	1
S5C, S5D	pri-mir-30e	NLSD3-D8-WT	2	0.19
S5C, S5D	pri-mir-30e	NLSD3-D8-E518K	2	0.186
S5C, S5D	pri-mir-30e	no	3	1
S5C, S5D	pri-mir-30e	NLSD3-D8-WT	3	0.116
S5C, S5D	pri-mir-30e	NLSD3-D8-E518K	3	0.081
S5E, S5F	pri-mir-342	no	1	1
S5E, S5F	pri-mir-342	NLSD3-D8-WT	1	0.742
S5E, S5F	pri-mir-342	NLSD3-D8-E518K	1	0.005
S5E, S5F	pri-mir-342	no	2	1
S5E, S5F	pri-mir-342	NLSD3-D8-WT	2	0.938
S5E, S5F	pri-mir-342	NLSD3-D8-E518K	2	0.319
S5E, S5F	pri-mir-342	no	3	1
S5E, S5F	pri-mir-342	NLSD3-D8-WT	3	0.916
S5E, S5F	pri-mir-342	NLSD3-D8-E518K	3	0.184
S5E, S5F	pri-mir-29b-1	no	1	1
S5E, S5F	pri-mir-29b-1	NLSD3-D8-WT	1	0.117
S5E, S5F	pri-mir-29b-1	NLSD3-D8-E518K	1	0.006
S5E, S5F	pri-mir-29b-1	no	2	1
S5E, S5F	pri-mir-29b-1	NLSD3-D8-WT	2	0.153
S5E, S5F	pri-mir-29b-1	NLSD3-D8-E518K	2	0.012
S5E, S5F	pri-mir-29b-1	no	3	1
S5E, S5F	pri-mir-29b-1	NLSD3-D8-WT	3	0.13
S5E, S5F	pri-mir-29b-1	NLSD3-D8-E518K	3	0.009

## Sheet: Supplementary Table 5
Supplementary Table 5. qPCR data analysis for miRNAs and pri-miRNAs
Figure	Cell line	Target	Repeat	Folds change(normalized to U6)
2H&N,3M&N,5A	HEK293T-WT	miR-16-1	1	0.761368
2H&N,3M&N,5A	HEK293T-WT	miR-16-1	2	1.02574
2H&N,3M&N,5A	HEK293T-WT	miR-16-1	3	1.28046
2H&N,3M&N,5A	HEK293T-WT	miR-30a	1	0.899171
2H&N,3M&N,5A	HEK293T-WT	miR-30a	2	1.30737
2H&N,3M&N,5A	HEK293T-WT	miR-30a	3	0.850667
2H	HEK293T-DGCR8-KO-1A5	miR-16-1	1	0.168534
2H	HEK293T-DGCR8-KO-1A5	miR-16-1	2	0.125676
2H	HEK293T-DGCR8-KO-1A5	miR-16-1	3	0.0808343
2H	HEK293T-DGCR8-KO-1A5	miR-30a	1	0.206056
2H	HEK293T-DGCR8-KO-1A5	miR-30a	2	0.159075
2H	HEK293T-DGCR8-KO-1A5	miR-30a	3	0.160181
2H	HEK293T-DGCR8-KO-6B1	miR-16-1	1	0.245421
2H	HEK293T-DGCR8-KO-6B1	miR-16-1	2	0.240371
2H	HEK293T-DGCR8-KO-6B1	miR-16-1	3	0.351111
2H	HEK293T-DGCR8-KO-6B1	miR-30a	1	0.156041
2H	HEK293T-DGCR8-KO-6B1	miR-30a	2	0.264866
2H	HEK293T-DGCR8-KO-6B1	miR-30a	3	0.218646
3M	HEK293T-DROSHA-KO-13A6	miR-16-1	1	3.97138e-05
3M	HEK293T-DROSHA-KO-13A6	miR-16-1	2	4.27613e-05
3M	HEK293T-DROSHA-KO-13A6	miR-16-1	3	2.63227e-05
3M	HEK293T-DROSHA-KO-13A6	miR-30a	1	0.091717
3M	HEK293T-DROSHA-KO-13A6	miR-30a	2	0.0515935
3M	HEK293T-DROSHA-KO-13A6	miR-30a	3	0.0469304
3N	HEK293T-DROSHA-KO-35-1H	miR-16-1	1	0.000109256
3N	HEK293T-DROSHA-KO-35-1H	miR-16-1	2	0.000125792
3N	HEK293T-DROSHA-KO-35-1H	miR-16-1	3	0.000130832
3N	HEK293T-DROSHA-KO-35-1H	miR-30a	1	0.166086
3N	HEK293T-DROSHA-KO-35-1H	miR-30a	2	0.0859714
3N	HEK293T-DROSHA-KO-35-1H	miR-30a	3	0.0910835
2N	A569-WT	miR-16-1	1	1.05458
2N	A569-WT	miR-16-1	2	1.05458
2N	A569-WT	miR-16-1	3	0.899171
2N	A569-WT	miR-30a	1	0.866537
2N	A569-WT	miR-30a	2	1.00928
2N	A569-WT	miR-30a	3	1.1434
2N	A569-DGCR8KO-25A2	miR-16-1	1	0.00628735
2N	A569-DGCR8KO-25A2	miR-16-1	2	0.00528701
2N	A569-DGCR8KO-25A2	miR-16-1	3	0.00946401
2N	A569-DGCR8KO-25A2	miR-30a	1	0.00133711
2N	A569-DGCR8KO-25A2	miR-30a	2	0.00089448
2N	A569-DGCR8KO-25A2	miR-30a	3	0.00107857
2N	A569-DGCR8KO-27C2	miR-16-1	1	0.0887977
2N	A569-DGCR8KO-27C2	miR-16-1	2	0.069188
2N	A569-DGCR8KO-27C2	miR-16-1	3	0.069188
2N	A569-DGCR8KO-27C2	miR-30a	1	0.00937694
2N	A569-DGCR8KO-27C2	miR-30a	2	0.00850976
2N	A569-DGCR8KO-27C2	miR-30a	3	0.00957397
5A	HEK293T-DGCR8-E518K-21A4	miR-16-1	1	1.05539
5A	HEK293T-DGCR8-E518K-21A4	miR-16-1	2	1.15491
5A	HEK293T-DGCR8-E518K-21A4	miR-16-1	3	1.35139
5A	HEK293T-DGCR8-E518K-21A4	miR-30a	1	0.465798
5A	HEK293T-DGCR8-E518K-21A4	miR-30a	2	0.446824
5A	HEK293T-DGCR8-E518K-21A4	miR-30a	3	0.642207
5A	HEK293T-DGCR8-E518K-31A4	miR-16-1	1	0.442032
5A	HEK293T-DGCR8-E518K-31A4	miR-16-1	2	0.804161
5A	HEK293T-DGCR8-E518K-31A4	miR-16-1	3	0.39563
5A	HEK293T-DGCR8-E518K-31A4	miR-30a	1	0.336549
5A	HEK293T-DGCR8-E518K-31A4	miR-30a	2	0.4694
5A	HEK293T-DGCR8-E518K-31A4	miR-30a	3	0.425006
S2F	HEK293T-WT	pri-miR-16-1	1	1.04488
S2F	HEK293T-WT	pri-miR-16-1	2	1.04488
S2F	HEK293T-WT	pri-miR-16-1	3	0.915945
S2F	HEK293T-WT	pri-miR-30a	1	0.890899
S2F	HEK293T-WT	pri-miR-30a	2	1.29834
S2F	HEK293T-WT	pri-miR-30a	3	0.864537
S2F	HEK293T-DGCR8-KO-1A5	pri-miR-16-1	1	43.5453
S2F	HEK293T-DGCR8-KO-1A5	pri-miR-16-1	2	43.1447
S2F	HEK293T-DGCR8-KO-1A5	pri-miR-16-1	3	41.3872
S2F	HEK293T-DGCR8-KO-1A5	pri-miR-30a	1	17.122
S2F	HEK293T-DGCR8-KO-1A5	pri-miR-30a	2	17.2411
S2F	HEK293T-DGCR8-KO-1A5	pri-miR-30a	3	17.2411
S2F	HEK293T-DGCR8-KO-6B1	pri-miR-16-1	1	30.3439
S2F	HEK293T-DGCR8-KO-6B1	pri-miR-16-1	2	27.0333
S2F	HEK293T-DGCR8-KO-6B1	pri-miR-16-1	3	27.4107
S2F	HEK293T-DGCR8-KO-6B1	pri-miR-30a	1	19.9272
S2F	HEK293T-DGCR8-KO-6B1	pri-miR-30a	2	19.1154
S2F	HEK293T-DGCR8-KO-6B1	pri-miR-30a	3	19.2484
S3D	HEK293T-DROSHA-KO-13A6	pri-miR-16-1	1	52.3054
S3D	HEK293T-DROSHA-KO-13A6	pri-miR-16-1	2	52.3054
S3D	HEK293T-DROSHA-KO-13A6	pri-miR-16-1	3	49.9434
S3D	HEK293T-DROSHA-KO-13A6	pri-miR-30a	1	10.8947
S3D	HEK293T-DROSHA-KO-13A6	pri-miR-30a	2	11.0723
S3D	HEK293T-DROSHA-KO-13A6	pri-miR-30a	3	11.1752
S3D	HEK293T-DROSHA-KO-35-1H	pri-miR-16-1	1	81.6976
S3D	HEK293T-DROSHA-KO-35-1H	pri-miR-16-1	2	80.0163
S3D	HEK293T-DROSHA-KO-35-1H	pri-miR-16-1	3	83.2218
S3D	HEK293T-DROSHA-KO-35-1H	pri-miR-30a	1	15.9508
S3D	HEK293T-DROSHA-KO-35-1H	pri-miR-30a	2	15.5505
S3D	HEK293T-DROSHA-KO-35-1H	pri-miR-30a	3	16.0617
S2H	A569-WT	pri-miR-16-1	1	0.842842
S2H	A569-WT	pri-miR-16-1	2	1.1434
S2H	A569-WT	pri-miR-16-1	3	1.03766
S2H	A569-WT	pri-miR-30a	1	0.876606
S2H	A569-WT	pri-miR-30a	2	1.18921
S2H	A569-WT	pri-miR-30a	3	0.959264
S2H	A569-DGCR8KO-25A2	pri-miR-16-1	1	8.24394
S2H	A569-DGCR8KO-25A2	pri-miR-16-1	2	6.20458
S2H	A569-DGCR8KO-25A2	pri-miR-16-1	3	8.41716
S2H	A569-DGCR8KO-25A2	pri-miR-30a	1	17.0299
S2H	A569-DGCR8KO-25A2	pri-miR-30a	2	17.1484
S2H	A569-DGCR8KO-25A2	pri-miR-30a	3	17.0299
S2H	A569-DGCR8KO-27C2	pri-miR-16-1	1	17.0072
S2H	A569-DGCR8KO-27C2	pri-miR-16-1	2	17.6069
S2H	A569-DGCR8KO-27C2	pri-miR-16-1	3	19.4012
S2H	A569-DGCR8KO-27C2	pri-miR-30a	1	23.6976
S2H	A569-DGCR8KO-27C2	pri-miR-30a	2	27.2213
S2H	A569-DGCR8KO-27C2	pri-miR-30a	3	26.2941

## Sheet: Supplementary Table 6
Supplementary Table 6. FACS analysis of cell death in DMEM medium.
Figure	cell line	repeats	Cell death(%)
Figure 6C&D	HEK293T-DGCR8-WT	1	3.94
Figure 6C&D	HEK293T-DGCR8-WT	2	4.96
Figure 6C&D	HEK293T-DGCR8-WT	3	4.1
Figure 6C&D	HEK293T-DGCR8-E518K-21A4	1	9.3
Figure 6C&D	HEK293T-DGCR8-E518K-21A4	2	8.47
Figure 6C&D	HEK293T-DGCR8-E518K-21A4	3	8.91
Figure 6C&D	HEK293T-DGCR8-E518K-31A4	1	7.03
Figure 6C&D	HEK293T-DGCR8-E518K-31A4	2	7.66
Figure 6C&D	HEK293T-DGCR8-E518K-31A4	3	7.72
Supplementary Table 6. Quantitative cell cycle analysis
Figure	cell line	repeats	G0/G1(%)	S(%)	G2/M(%)
Figure 6A&B and S6A	HEK293T-DGCR8-WT	1	47.3	29.1	22.2
Figure 6A&B and S6A	HEK293T-DGCR8-WT	2	51.6	28.3	18.4
Figure 6A&B and S6A	HEK293T-DGCR8-WT	3	48.8	29.2	20.3
Figure 6A&B and S6A	HEK293T-DGCR8-KO-1A5	1	61.6	17.2	17.7
Figure 6A&B and S6A	HEK293T-DGCR8-KO-1A5	2	62.6	17.2	15.6
Figure 6A&B and S6A	HEK293T-DGCR8-KO-1A5	3	60.4	18	18.2
Figure 6A&B and S6A	HEK293T-DGCR8-E518K-21A4	1	54	27.7	15.3
Figure 6A&B and S6A	HEK293T-DGCR8-E518K-21A4	2	52.4	27.7	17.1
Figure 6A&B and S6A	HEK293T-DGCR8-E518K-21A4	3	52.5	28.7	16.1
Figure 6A&B and S6A	HEK293T-DGCR8-E518K-31A4	1	54.8	24.5	18.2
Figure 6A&B and S6A	HEK293T-DGCR8-E518K-31A4	2	56.5	24	16.9
Figure 6A&B and S6A	HEK293T-DGCR8-E518K-31A4	3	54.8	25.5	16.8
Supplementary Table 6. Wound healing assay to evaluate migration ability.
Figure	cell line	repeats	migration length(μm)
Figure 6E&F	HEK293T-DGCR8-WT	1	312.787
Figure 6E&F	HEK293T-DGCR8-WT	2	321.798
Figure 6E&F	HEK293T-DGCR8-WT	3	304.213
Figure 6E&F	HEK293T-DGCR8-E518K-21A4	1	344.181
Figure 6E&F	HEK293T-DGCR8-E518K-21A4	2	317.819
Figure 6E&F	HEK293T-DGCR8-E518K-21A4	3	322.59
Figure 6E&F	HEK293T-DGCR8-E518K-31A4	1	347.786
Figure 6E&F	HEK293T-DGCR8-E518K-31A4	2	346.865
Figure 6E&F	HEK293T-DGCR8-E518K-31A4	3	355.477
Supplementary Table 6. mCherry mRNA stability assay
Figure	plasmids and day point	repeats	Folds change(normalized to ZsGReen and GAPDH)
Figure S1D	Microsensor-plus + 0 Day	1	0.983957
Figure S1D	Microsensor-plus + 0 Day	2	1.06191
Figure S1D	Microsensor-plus + 0 Day	3	0.95705
Figure S1D	Microsensor-plus + 1 Day	1	0.298679
Figure S1D	Microsensor-plus + 1 Day	2	0.313528
Figure S1D	Microsensor-plus + 1 Day	3	0.307076
Figure S1D	Microsensor-plus + 2 Day	1	0.206374
Figure S1D	Microsensor-plus + 2 Day	2	0.189903
Figure S1D	Microsensor-plus + 2 Day	3	0.191224
Figure S1D	Microsensor-minus + 0 Day	1	1.05458
Figure S1D	Microsensor-minus + 0 Day	2	1.00463
Figure S1D	Microsensor-minus + 0 Day	3	0.943874
Figure S1D	Microsensor-minus + 1 Day	1	0.598739
Figure S1D	Microsensor-minus + 1 Day	2	0.61132
Figure S1D	Microsensor-minus + 1 Day	3	0.619854
Figure S1D	Microsensor-minus + 2 Day	1	0.558644
Figure S1D	Microsensor-minus + 2 Day	2	0.539614
Figure S1D	Microsensor-minus + 2 Day	3	0.554785
